# Supplementary material
Source: Springer Nature journal article supplement (https://www.springermedizin.de/resource/supplementary/12936_2012_2607_MOESM3_ESM.pdf/9543306)

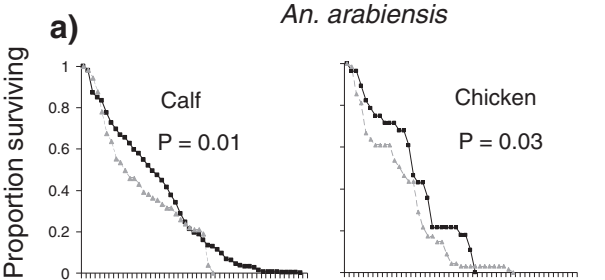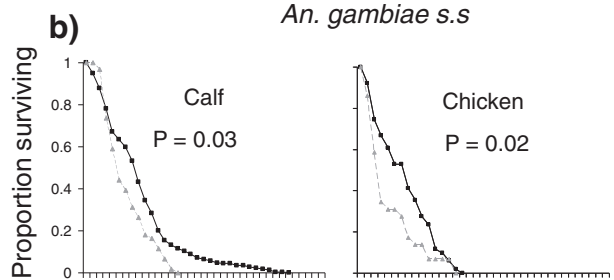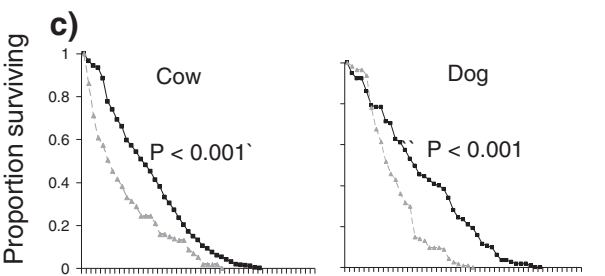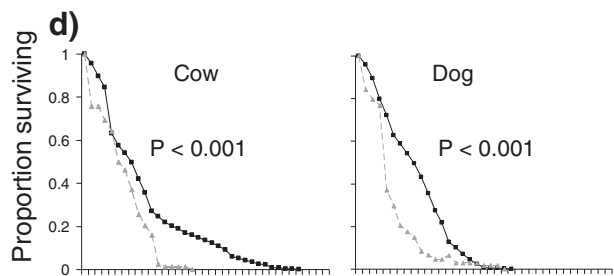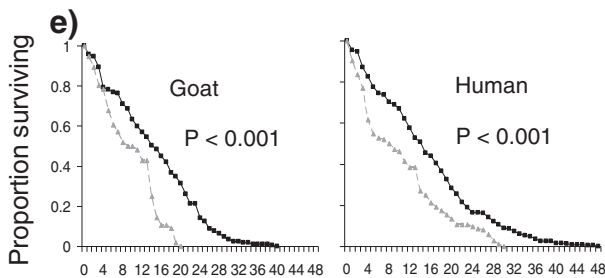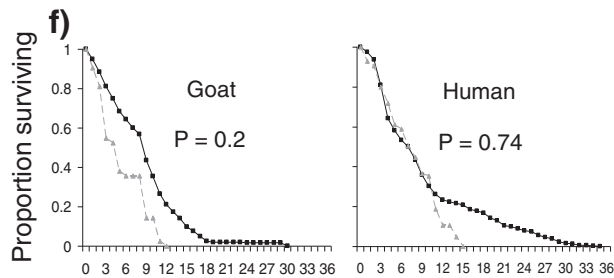

Supplement: MOESM3 [file 9543306]
